# Supplementary material for: Muscle Tone, Stiffness, and Elasticity in Elite Female Cyclists after Consecutive Short Competitions
Source: Hindawi journal article supplement (doi:10.1155/2024/2434494), 2024-04-02
Supplement: f1 [file 2434494.f1.zip]

| Subject | Muscle       | Frequency 1 | Stiffness 1 | Decrement 1 | Frequency 5 | Stiffness 5 | Decrement 5 |
|---------|--------------|-------------|-------------|-------------|-------------|-------------|-------------|
| 1       | Vastus lt    | 16.16       | 307.2       | 1.65        | 16.44       | 316.0       | 1.48        |
| 2       | Vastus lt    | 16.44       | 272.0       | 1.44        | 14.98       | 276.6       | 1.15        |
| 3       | Vastus lt    | 13.86       | 262.8       | 1.62        | 14.61       | 252.0       | 0.94        |
| 4       | Vastus lt    | 14.52       | 283.8       | 1.54        | 14.73       | 262.2       | 1.26        |
| 5       | Vastus lt    | 12.84       | 241.6       | 1.49        | 13.39       | 238.4       | 1.31        |
| 6       | Vastus lt    | 15.24       | 270.4       | 1.10        | 16.20       | 289.6       | 1.00        |
| 1       | Vastus m     | 16.06       | 281.6       | 1.54        | 14.77       | 263.8       | 1.56        |
| 2       | Vastus m     | 12.62       | 224.6       | 1.36        | 13.54       | 244.0       | 1.49        |
| 3       | Vastus m     | 12.34       | 210.6       | 1.25        | 12.11       | 206.6       | 1.06        |
| 4       | Vastus m     | 14.34       | 239.8       | 1.36        | 12.79       | 227.4       | 1.15        |
| 5       | Vastus m     | 13.57       | 218.8       | 1.37        | 12.88       | 221.4       | 1.29        |
| 6       | Vastus m     | 13.16       | 229.8       | 1.20        | 12.89       | 242.4       | 1.16        |
| 1       | Rect Femoris | 16.32       | 268.8       | 1.75        | 16.02       | 302.4       | 1.82        |
| 2       | Rect Femoris | 14.59       | 266.2       | 1.48        | 14.06       | 273.4       | 1.70        |
| 3       | Rect Femoris | 14.43       | 260.6       | 1.29        | 14.05       | 260.0       | 1.20        |
| 4       | Rect Femoris | 12.79       | 205.8       | 1.27        | 13.49       | 245.4       | 1.47        |
| 5       | Rect Femoris | 12.92       | 213.4       | 1.45        | 13.43       | 238.6       | 1.67        |
| 6       | Rect Femoris | 13.35       | 243.0       | 1.33        | 13.65       | 253.0       | 1.21        |
| 1       | Bic Fem c br | 15.55       | 274.0       | 1.72        | 14.75       | 277.0       | 1.50        |
| 2       | Bic Fem c br | 14.92       | 265.4       | 1.43        | 15.10       | 284.4       | 1.62        |
| 3       | Bic Fem c br | 14.65       | 243.8       | 1.15        | 13.91       | 248.2       | 1.12        |
| 4       | Bic Fem c br | 13.14       | 212.2       | 1.21        | 13.33       | 213.8       | 1.11        |
| 5       | Bic Fem c br | 13.14       | 237.8       | 1.41        | 12.66       | 222.4       | 1.35        |
| 6       | Bic Fem c br | 14.39       | 256.6       | 1.28        | 14.15       | 249.8       | 1.27        |
| 1       | Gastr c lt   | 13.86       | 242.4       | 1.33        | 14.20       | 237.2       | 1.33        |
| 2       | Gastr c lt   | 14.28       | 255.4       | 1.33        | 14.68       | 243.0       | 1.07        |
| 3       | Gastr c lt   | 15.06       | 257.6       | 1.12        | 15.08       | 263.4       | 1.03        |
| 4       | Gastr c lt   | 13.90       | 235.2       | 1.36        | 14.29       | 229.4       | 1.21        |
| 5       | Gastr c lt   | 13.18       | 226.4       | 1.28        | 13.90       | 245.4       | 1.42        |
| 6       | Gastr c lt   | 14.18       | 261.2       | 1.60        | 14.03       | 256.8       | 1.48        |
| 1       | Gastr c m    | 15.10       | 252.8       | 1.62        | 16.13       | 255.8       | 1.50        |
| 2       | Gastr c m    | 14.74       | 240.6       | 1.37        | 13.43       | 214.4       | 1.05        |
| 3       | Gastr c m    | 15.54       | 245.2       | 1.33        | 15.22       | 254.4       | 1.18        |
| 4       | Gastr c m    | 14.64       | 237.8       | 1.38        | 14.95       | 231.0       | 1.28        |
| 5       | Gastr c m    | 13.23       | 223.6       | 1.49        | 15.02       | 235.2       | 1.46        |
| 6       | Gastr c m    | 15.25       | 266.2       | 1.60        | 14.65       | 250.4       | 1.62        |
