# Supplementary material for: Muscle Tone, Stiffness, and Elasticity in Elite Female Cyclists after Consecutive Short Competitions
Source: Hindawi journal article supplement (doi:10.1155/2024/2434494), 2024-04-02
Supplement: f1 [file 2434494.f1.zip]

| Subject | Muscle         | Frequency PRE | Frequency POST | Stif PRE | Stif POST | Decrem PRE | Decrem POST |
|---------|----------------|---------------|----------------|----------|-----------|------------|-------------|
| 1       | Vast lateral   | 16.16         | 15.07          | 297.2    | 281.4     | 1.65       | 1.28        |
| 2       | Vast lateral   | 15.35         | 14.66          | 273.8    | 257.2     | 1.37       | 1.24        |
| 3       | Vast lateral   | 14.07         | 13.3           | 267.6    | 238.2     | 1.14       | 1.0         |
| 4       | Vast lateral   | 15.5          | 14.78          | 275.8    | 269.6     | 1.21       | 1.12        |
| 5       | Vast lateral   | 13.57         | 12.84          | 239      | 226.6     | 1.4        | 1.38        |
| 6       | Vast lateral   | 16.45         | 14.47          | 299.6    | 262.4     | 1.22       | 1.03        |
| 1       | Vast medial    | 15.73         | 16.55          | 280      | 285.8     | 1.47       | 1.46        |
| 2       | Vast medial    | 12.84         | 12.81          | 224      | 224       | 1.32       | 1.1         |
| 3       | Vast medial    | 12.88         | 12.18          | 226.2    | 208.8     | 1.25       | 1.14        |
| 4       | Vast medial    | 13.6          | 12.58          | 245.4    | 212.2     | 1.01       | 1.03        |
| 5       | Vast medial    | 13.57         | 12.75          | 237.2    | 222.6     | 1.2        | 1.15        |
| 6       | Vast medial    | 13.04         | 12.15          | 239.6    | 196       | 1.21       | 0.94        |
| 1       | Recte femoral  | 15.4          | 16.72          | 277.4    | 275.4     | 1.84       | 1.44        |
| 2       | Recte femoral  | 14.56         | 14.34          | 254.2    | 248.4     | 1.47       | 1.24        |
| 3       | Recte femoral  | 14.79         | 14.3           | 263      | 255.4     | 1.33       | 1.18        |
| 4       | Recte femoral  | 12.34         | 12.88          | 201.8    | 201.2     | 1.21       | 1.0         |
| 5       | Recte femoral  | 13.73         | 13.11          | 241.2    | 214       | 1.41       | 1.27        |
| 6       | Recte femoral  | 13.31         | 12.32          | 246.6    | 197.6     | 1.13       | 1.12        |
| 1       | Biceps femoral | 15.3          | 14.94          | 285.4    | 268.8     | 1.47       | 1.42        |
| 2       | Biceps femoral | 14.68         | 14.89          | 259.8    | 260       | 1.36       | 1.35        |
| 3       | Biceps femoral | 15.17         | 14.18          | 277.2    | 249.8     | 1.31       | 1.22        |
| 4       | Biceps femoral | 14.23         | 13.02          | 235.8    | 195       | 1.03       | 1.06        |
| 5       | Biceps femoral | 12.5          | 12             | 215.4    | 199.8     | 1.4        | 1.3         |
| 6       | Biceps femoral | 17.23         | 14.09          | 311.2    | 248.4     | 1.53       | 1.21        |
| 1       | Gastrc lateral | 14.8          | 14             | 258.4    | 237.6     | 1.1        | 1.13        |
| 2       | Gastrc lateral | 13.73         | 14.5           | 234.6    | 235.6     | 1.24       | 1.21        |
| 3       | Gastrc lateral | 16.56         | 14.86          | 291.4    | 261.2     | 0.93       | 1.1         |
| 4       | Gastrc lateral | 14.57         | 13.77          | 258      | 233.4     | 1.15       | 1.13        |
| 5       | Gastrc lateral | 13.14         | 13.28          | 238.6    | 223.4     | 1.3        | 1.18        |
| 6       | Gastrc lateral | 14.3          | 13.47          | 273.6    | 242.8     | 1.47       | 1.38        |
| 1       | Gastrc medial  | 16.9          | 16.34          | 309.8    | 268.2     | 1.25       | 1.27        |
| 2       | Gastrc medial  | 15.44         | 15.52          | 234.4    | 244       | 1.15       | 1.2         |
| 3       | Gastrc medial  | 18.23         | 15.88          | 297      | 254.2     | 1.08       | 1.15        |
| 4       | Gastrc medial  | 15.65         | 14.83          | 261      | 238.2     | 1.01       | 1.25        |
| 5       | Gastrc medial  | 14.75         | 13.13          | 239.2    | 220.8     | 1.32       | 1.2         |
| 6       | Gastrc medial  | 16.6          | 15.12          | 282.2    | 247.6     | 1.49       | 1.33        |
