# Supplementary material for: Muscle Tone, Stiffness, and Elasticity in Elite Female Cyclists after Consecutive Short Competitions
Source: Hindawi journal article supplement (doi:10.1155/2024/2434494), 2024-04-02
Supplement: f1 [file 2434494.f1.zip]

| Subject | Muscle         | Frequency PRE | Frequency POST | Stiff PRE | Stiff POST | Decrem PRE | Decrem POST |
|---------|----------------|---------------|----------------|-----------|------------|------------|-------------|
| 1       | Vast lateral   | 16.16         | 15.07          | 297.2     | 281.4      | 1.65       | 1.28        |
| 2       | Vast lateral   | 15.35         | 14.66          | 273.8     | 257.2      | 1.37       | 1.24        |
| 3       | Vast lateral   | 14.07         | 13.30          | 267.6     | 238.2      | 1.14       | 1.00        |
| 4       | Vast lateral   | 15.50         | 14.78          | 275.8     | 269.6      | 1.21       | 1.12        |
| 5       | Vast lateral   | 13.57         | 12.84          | 239.0     | 226.6      | 1.40       | 1.38        |
| 6       | Vast lateral   | 16.45         | 14.47          | 299.6     | 262.4      | 1.22       | 1.03        |
| 1       | Vast medial    | 15.73         | 16.55          | 280.0     | 285.8      | 1.47       | 1.46        |
| 2       | Vast medial    | 12.84         | 12.81          | 224.0     | 224.0      | 1.32       | 1.10        |
| 3       | Vast medial    | 12.88         | 12.18          | 226.2     | 208.8      | 1.25       | 1.14        |
| 4       | Vast medial    | 13.60         | 12.58          | 245.4     | 212.2      | 1.01       | 1.03        |
| 5       | Vast medial    | 13.57         | 12.75          | 237.2     | 222.6      | 1.20       | 1.15        |
| 6       | Vast medial    | 13.04         | 12.15          | 239.6     | 196.0      | 1.21       | 0.94        |
| 1       | Recte femoral  | 15.40         | 16.72          | 277.4     | 275.4      | 1.84       | 1.44        |
| 2       | Recte femoral  | 14.56         | 14.34          | 254.2     | 248.4      | 1.47       | 1.24        |
| 3       | Recte femoral  | 14.79         | 14.3           | 263.0     | 255.4      | 1.33       | 1.18        |
| 4       | Recte femoral  | 12.34         | 12.88          | 201.8     | 201.2      | 1.21       | 1.00        |
| 5       | Recte femoral  | 13.73         | 13.11          | 241.2     | 214.0      | 1.41       | 1.27        |
| 6       | Recte femoral  | 13.31         | 12.32          | 246.6     | 197.6      | 1.13       | 1.12        |
| 1       | Biceps femoral | 15.30         | 14.94          | 285.4     | 268.8      | 1.47       | 1.42        |
| 2       | Biceps femoral | 14.68         | 14.89          | 259.8     | 260.0      | 1.36       | 1.35        |
| 3       | Biceps femoral | 15.17         | 14.18          | 277.2     | 249.8      | 1.31       | 1.22        |
| 4       | Biceps femoral | 14.23         | 13.02          | 235.8     | 195.0      | 1.03       | 1.06        |
| 5       | Biceps femoral | 12.50         | 12.00          | 215.4     | 199.8      | 1.40       | 1.30        |
| 6       | Biceps femoral | 17.23         | 14.09          | 311.2     | 248.4      | 1.53       | 1.21        |
| 1       | Gastrc lateral | 14.80         | 14.00          | 258.4     | 237.6      | 1.10       | 1.13        |
| 2       | Gastrc lateral | 13.73         | 14.50          | 234.6     | 235.6      | 1.24       | 1.21        |
| 3       | Gastrc lateral | 16.56         | 14.86          | 291.4     | 261.2      | 0.93       | 1.10        |
| 4       | Gastrc lateral | 14.57         | 13.77          | 258.0     | 233.4      | 1.15       | 1.13        |
| 5       | Gastrc lateral | 13.14         | 13.28          | 238.6     | 223.4      | 1.30       | 1.18        |
| 6       | Gastrc lateral | 14.30         | 13.47          | 273.6     | 242.8      | 1.47       | 1.38        |
| 1       | Gastrc medial  | 16.90         | 16.34          | 309.8     | 268.2      | 1.25       | 1.27        |
| 2       | Gastrc medial  | 15.44         | 15.52          | 234.4     | 244.0      | 1.15       | 1.20        |
| 3       | Gastrc medial  | 18.23         | 15.88          | 297.0     | 254.2      | 1.08       | 1.15        |
| 4       | Gastrc medial  | 15.65         | 14.83          | 261.0     | 238.2      | 1.01       | 1.25        |
| 5       | Gastrc medial  | 14.75         | 13.13          | 239.2     | 220.8      | 1.32       | 1.20        |
| 6       | Gastrc medial  | 16.60         | 15.12          | 282.2     | 247.6      | 1.49       | 1.33        |
