# Supplementary material for: Muscle Tone, Stiffness, and Elasticity in Elite Female Cyclists after Consecutive Short Competitions
Source: Transl Sports Med. 2024 Apr 2;2024:2434494. doi: 10.1155/2024/2434494 (PMC11023733; doi:10.1155/2024/2434494)
Supplement: Supplementary Materials — Supplementary file #1: muscle basal properties. Muscle tone, stiffness, and elasticity in the familiarisation phase. Supplementary file #2: muscle parameters before and after C1.pdf. Muscle tone, stiffness, and elasticity before and after Competition 1. Supplementary file #3: muscle parameters before and after C2.pdf. Muscle tone, stiffness, and elasticity before and after Competition 2. [file 2434494.f1.zip]

Archive with 3 entries (3 files):
- Muscle Basal Parameters.pdf
- Muscle parameters before-after C1.pdf
- Muscle parameters before-after C2.pdf
